# Supplementary material for: The Regulatory Repertoire of Pseudomonas aeruginosa AmpC ß-Lactamase Regulator AmpR Includes Virulence Genes
Source: PLoS One. 2012 Mar 29;7(3):e34067. doi: 10.1371/journal.pone.0034067 (PMC3315558; doi:10.1371/journal.pone.0034067)
Supplement: Table S1 — Key to identifying the AmpR-dependent, and AmpR- and ß-lactam dependent genes from the venn diagram ( Fig. 4 ). Condition A: PAO1 uninduced vs PAO1 induced; Condition B: PAOΔampR uninduced vs PAOΔampR induced; Condition C: PAO1 uninduced vs PAOΔampR uninduced; Condition D: PAO1 induced vs PAOΔampR induced. NA- not applicable. (XLSX) [file pone.0034067.s001.xlsx]

## Sheet: Table S1
Table S1: Key to identifying the AmpR-dependent, and AmpR- and ß-lactam dependent genes from the venn diagram (Fig 4). Condition A: PAO1 uninduced vs PAO1 induced; Condition B: PAO∆ampR uninduced vs PAO∆ampR induced; Condition C: PAO1 uninduced vs PAO∆ampR uninduced; Condition D: PAO1 induced vs PAO∆ampR induced. NA- not applicable.
Regulation	Condition	Condition	Condition	AmpR Regulation
AmpR dependent, ß-lactam independent	C- up	D- up	--	Negative
	C- down	D- down	--	Positive
	C- up	B- up	--	Negative
	C- down	B- down	--	Positive
	A- up	B- down	C- down	Positive
	A- down	C- up	D- up	Negative
AmpR dependent, ß-lactam dependent	A- down	B- up	--	Negative
	A- up	B- down	--	Positive
	A- up	D- down	--	Positive
	A- down	D- up	B- up	Negative
AmpR independent, ß-lactam dependent	C- down	D- up	--	NA
	C- up	D- down	--	NA
	A- down	B-down	--	NA
	A- up	B- up	--	NA
	A- up	D- up	--	NA
	A- up	C- down	D- up	NA
	B- up	D- down	C- up	NA
