# Supplementary material for: The Regulatory Repertoire of Pseudomonas aeruginosa AmpC ß-Lactamase Regulator AmpR Includes Virulence Genes
Source: PLoS One. 2012 Mar 29;7(3):e34067. doi: 10.1371/journal.pone.0034067 (PMC3315558; doi:10.1371/journal.pone.0034067)
Supplement: Table S2 — ß-lactam-dependent genes. The 206 ß-lactam stress-dependent genes are separated into upregulated and downregulated genes with the corresponding corrected p-values for the fold change (FC) observed. The genes are arranged based on either (A) functional categorization, or (B) fold change. Locus tag annotations are from the Pseudomonas Genome database [31]. (XLSX) [file pone.0034067.s002.xlsx]

## Sheet: Table S2
Table S2: ß-lactam-dependent genes. The 206 ß-lactam stress-dependent genes are separated into upregulated and downregulated genes with the corresponding corrected p-values for the fold change (FC) observed. The genes are arranged based on either (A) functional categorization, or (B) fold change. Locus tag annotations are from the Pseudomonas Genome database (31).
S2A
Downregulated genes
Locus Tag	Gene Name	Product Name	FC	Corrected p-value
Adaptation, Protection
PA4078		probable nonribosomal peptide synthetase	-3.62189	0.00407406
Amino acid biosynthesis and metabolism
PA5098	hutH	histidine ammonia-lyase	-21.3937	0.00214536
PA5100	hutU	urocanase	-10.4602	0.00260954
PA3700	lysS	lysyl-tRNA synthetase	-2.12779	0.0057846
Carbon compound catabolism
PA0792	prpD	propionate catabolic protein PrpD	-3.84939	0.00844429
PA2300	chiC	chitinase	-20.1835	0.000416842
Cell wall / LPS / capsule ; Adaptation, Protection
PA1130	rhlC	rhamnosyltransferase 2	-5.39615	0.00532248
Central intermediary metabolism
PA5549	glmS	glucosamine--fructose-6-phosphate aminotransferase	-2.53524	0.00228129
Energy metabolism
PA3930	cioA	cyanide insensitive terminal oxidase	-3.75645	0.00668992
Hypothetical, unclassified, unknown
PA0088		hypothetical protein	-3.15726	0.00439107
PA0122		conserved hypothetical protein	-9.24319	0.00660793
PA0271		hypothetical protein	-2.98148	0.0031022
PA1494		conserved hypothetical protein	-2.53601	0.0049448
PA1896		hypothetical protein	-2.65175	0.00176067
PA2066		hypothetical protein	-4.79463	0.00507489
PA2111		hypothetical protein	-2.27471	0.0027833
PA2223		hypothetical protein	-3.35337	0.00958539
PA2274		hypothetical protein	-8.65234	0.00391758
PA2441		hypothetical protein	-3.4111	0.00532807
PA2448		hypothetical protein	-7.93557	0.00507489
PA2684		conserved hypothetical protein	-2.20465	0.0027833
PA3229		hypothetical protein	-2.11767	0.00466136
PA3734		hypothetical protein	-4.13509	0.00870108
PA3928		hypothetical protein	-3.48601	0.00728415
PA4035		hypothetical protein	-2.63718	0.00260954
PA4141		hypothetical protein	-8.71186	0.00328669
PA5106		conserved hypothetical protein	-10.4093	0.0044489
PA5201		conserved hypothetical protein	-2.49256	0.00214536
PA5220		hypothetical protein	-9.37599	0.00471074
Membrane proteins
PA0070		hypothetical protein	-2.04678	0.00724362
PA1895		hypothetical protein	-3.33575	0.00371406
PA5183		hypothetical protein	-4.31571	0.0044489
PA1212		probable major facilitator superfamily (MFS) transporter	-2.90985	0.00730891
PA2068		probable major facilitator superfamily (MFS) transporter	-11.7466	0.00341808
PA2327		probable permease of ABC transporter	-5.80293	0.0065746
PA4034	aqpZ	aquaporin Z	-26.0824	0.00214536
PA5095		probable permease of ABC transporter	-11.9896	0.00214536
PA5097		probable amino acid permease	-20.6904	0.0027833
PA5099		probable transporter	-12.3827	0.00420613
Motility & Attachment
PA0171		hypothetical protein	-2.97699	0.00367626
PA3361	lecB	fucose-binding lectin PA-IIL	-2.07591	0.00912227
Protein secretion/export apparatus
PA1718	pscE	type III export protein PscE	-3.17748	0.003711
PA3820	secF	secretion protein SecF	-2.41936	0.00962856
Putative enzymes
PA0130		probable aldehyde dehydrogenase	-2.05051	0.00912227
PA0372		probable zinc protease	-2.30846	0.002909
PA1914		conserved hypothetical protein	-14.8282	0.00711941
PA2067		probable hydrolase	-12.0367	0.0017601
PA2069		probable carbamoyl transferase	-35.4211	0.00265537
PA4715		probable aminotransferase	-4.70636	0.00610012
PA5093		probable histidine/phenylalanine ammonia-lyase	-12.5351	0.00373239
PA0075	pppA	PppA	-2.93958	0.00595762
Secreted Factors (toxins, enzymes, alginate)
PA0852	cbpD	chitin-binding protein CbpD precursor	-6.71127	0.00341217
PA1901	phzC2	phenazine biosynthesis protein PhzC	-9.17936	0.00562035
PA1902	phzD2	phenazine biosynthesis protein PhzD	-10.7387	0.00407406
PA1903	phzE2	phenazine biosynthesis protein PhzE	-17.1445	0.00581017
PA1904	phzF2	probable phenazine biosynthesis protein	-15.8398	0.00398076
PA1905	phzG2	probable pyridoxamine 5'-phosphate oxidase	-19.7628	0.00344461
PA1871	lasA	LasA protease precursor	-7.89864	0.00679781
Transcription, RNA processing and degradation
PA4238	rpoA	DNA-directed RNA polymerase alpha chain	-2.00211	0.00391346
Translation, post-translational modification, degradation
PA2619	infA	initiation factor	-2.98971	0.0044489
PA4241	rpsM	30S ribosomal protein S13	-2.60028	0.00903018
PA0090	clpV1	ClpV1	-3.63675	0.0040167
Transport of small molecules
PA0603		probable ATP-binding component of ABC transporter	-2.00354	0.00773947
PA5094		probable ATP-binding component of ABC transporter	-12.6543	0.0027833
PA5096		probable binding protein component of ABC transporter	-11.5018	0.0049448
Upregulated genes
Locus Tag	Gene Name	Product Name	FC	Corrected p-value
Adaptation, Protection
PA0176	aer2	aerotaxis transducer Aer2	4.8617	0.00773947
PA0177		probable purine-binding chemotaxis protein	3.07191	0.00987334
PA1646		probable chemotaxis transducer	2.57132	0.00741064
PA2570	lecA	LecA	41.6505	0.00159891
PA2654		probable chemotaxis transducer	3.18966	0.0027833
PA2788		probable chemotaxis transducer	2.12575	0.00476976
PA3236		probable glycine betaine-binding protein precursor	11.3087	0.0027833
PA3349		probable chemotaxis protein	2.43175	0.0057846
PA4310	pctB	chemotactic transducer PctB	2.59202	0.00340334
PA4566	obg	GTP-binding protein Obg	2.63453	0.0041201
PA4633		probable chemotaxis transducer	3.0195	0.00353733
PA5072		probable chemotaxis transducer	2.1945	0.00436114
Amino acid biosynthesis and metabolism
PA4759	dapB	dihydrodipicolinate reductase	2.62135	0.00912227
PA5379	sdaB	L-serine dehydratase	4.13758	0.00529893
PA5398	dgcA	DgcA, Dimethylglycine catabolism	8.38892	0.00214536
PA5399	dgcB	DgcB, Dimethylglycine catabolism	7.2711	0.0027833
PA5410	gbcA	GbcA	13.7664	0.00296383
PA5411	gbcB	GbcB	7.09809	0.0027833
PA5416	soxB	sarcosine oxidase beta subunit	11.6343	0.00294923
PA5417	soxD	sarcosine oxidase delta subunit	15.7831	0.0027833
PA5419	soxG	sarcosine oxidase gamma subunit	6.46306	0.00773947
PA5429	aspA	aspartate ammonia-lyase	2.39373	0.00912227
Carbon compound catabolism
PA4124	hpcB	homoprotocatechuate 2,3-dioxygenase	3.97839	0.00880709
PA5418	soxA	sarcosine oxidase alpha subunit	7.38446	0.00346246
Cell wall / LPS / capsule
PA1078	flgC	flagellar basal-body rod protein FlgC	3.44371	0.0044489
PA1079	flgD	flagellar basal-body rod modification protein FlgD	2.9894	0.0057846
PA1080	flgE	flagellar hook protein FlgE	3.2875	0.00719426
PA1087	flgL	flagellar hook-associated protein type 3 FlgL	2.78227	0.00741064
PA1094	fliD	flagellar capping protein FliD	2.22834	0.00923342
PA1959	bacA	bacitracin resistance protein	4.24095	0.00770803
PA4700	mrcB	penicillin-binding protein 1B	3.5492	0.00371406
Central intermediary metabolism
PA4640	mqoB	malate:quinone oxidoreductase	2.48996	0.00431837
PA4880		probable bacterioferritin	4.16153	0.00912227
PA5421	fdhA	glutathione-independent formaldehyde dehydrogenase	5.24783	0.00959237
Chaperones & heat shock proteins
PA3126	ibpA	heat-shock protein IbpA	2.68754	0.00990461
Chemotaxis ; Adaptation, Protection ; Motility & Attachment
PA1452	flhA	flagellar biosynthesis protein FlhA	2.74238	0.00847349
DNA replication, recombination, modification and repair
PA3745	rpsP	30S ribosomal protein S16	4.33333	0.00929397
PA4763	recN	DNA repair protein RecN	2.4595	0.00657288
Energy metabolism
PA2953		electron transfer flavoprotein-ubiquinone oxidoreductase	2.70955	0.00826818
PA5400		probable electron transfer flavoprotein alpha subunit	4.20318	0.00575939
PA5491		probable cytochrome	2.33029	0.00469669
Hypothetical, unclassified, unknown
PA0026	plcB	phospholipase C, PlcB	2.86758	0.00750979
PA0277		conserved hypothetical protein	6.55905	0.00466136
PA0572		hypothetical protein	2.77556	0.00987334
PA0578		conserved hypothetical protein	4.74042	0.00929397
PA0613		hypothetical protein	6.18583	0.00544899
PA0718		hypothetical protein of bacteriophage Pf1	3.24203	0.00958539
PA0922		hypothetical protein	2.64587	0.00754782
PA1029		hypothetical protein	2.66239	0.0044489
PA1030		hypothetical protein	3.15447	0.00838624
PA1093		hypothetical protein	2.26105	0.00743344
PA1095		hypothetical protein	2.46753	0.00364495
PA1096		hypothetical protein	2.25432	0.00214536
PA1441		hypothetical protein	2.95505	0.00269214
PA1967		hypothetical protein	3.70572	0.00826224
PA1970		hypothetical protein	15.5562	0.00137808
PA2171		hypothetical protein	2.64974	0.00912227
PA2288		hypothetical protein	2.93155	0.00228129
PA2366		uricase PuuD	10.2043	0.00433459
PA2367		hypothetical protein	8.42419	0.0044489
PA2368		hypothetical protein	8.6232	0.0044489
PA2370		hypothetical protein	4.55435	0.00582889
PA2485		hypothetical protein	2.71709	0.00912227
PA2759		hypothetical protein	2.53626	0.00832556
PA2762		hypothetical protein	5.12121	0.00294533
PA2971		conserved hypothetical protein	3.3137	0.00191705
PA3179		conserved hypothetical protein	2.43159	0.00214536
PA3274		hypothetical protein	2.8639	0.00995442
PA3414		hypothetical protein	3.18837	0.00851687
PA3500		conserved hypothetical protein	4.20347	0.00391888
PA3501		hypothetical protein	5.59648	0.00667125
PA3502		hypothetical protein	5.3705	0.00701457
PA3510		hypothetical protein	7.62027	0.00357263
PA3513		hypothetical protein	5.38524	0.00664935
PA3520		hypothetical protein	7.31388	0.00473571
PA3691		hypothetical protein	2.59874	0.00912227
PA3952		hypothetical protein	2.06164	0.00912227
PA4354		conserved hypothetical protein	21.5444	0.00317818
PA4359		conserved hypothetical protein	2.65332	0.00995442
PA4623		hypothetical protein	20.0325	0.0013904
PA4635		conserved hypothetical protein	5.20877	0.00373239
PA4746		conserved hypothetical protein	5.5248	0.00920432
PA4826		hypothetical protein	3.77163	0.00733062
PA4852		conserved hypothetical protein	4.1429	0.00395033
PA4881		hypothetical protein	106.669	0.00072161
PA4908		hypothetical protein	3.67316	0.00580724
PA4917		hypothetical protein	2.79291	0.00743344
PA4985		hypothetical protein	2.88708	0.00353733
PA5378		hypothetical protein	2.7637	0.00769127
PA5395		conserved hypothetical protein	2.24747	0.00962856
PA5396		hypothetical protein	11.4104	0.00353733
PA5397		hypothetical protein	13.1454	0.0027833
PA5401		hypothetical protein	8.3017	0.00456502
PA5446		hypothetical protein	2.7421	0.00912227
PA5465		hypothetical protein	3.03223	0.00664935
PA5471		hypothetical protein	5.05157	0.00625811
Membrane proteins
PA0109		hypothetical protein	2.09407	0.00733062
PA0241		probable major facilitator superfamily (MFS) transporter	2.64648	0.00951468
PA1073	braD	branched-chain amino acid transport protein BraD	2.58774	0.0027833
PA2369		hypothetical protein	3.07589	0.00711694
PA3512		probable permease of ABC transporter	5.28538	0.00420613
PA4933		hypothetical protein	5.82431	0.00880709
PA4940		conserved hypothetical protein	4.6249	0.00826818
PA5409		hypothetical protein	2.31219	0.00214536
Nucleotide biosynthesis and metabolism
PA3654	pyrH	uridylate kinase	3.53111	0.00624259
PA5420	purU2	formyltetrahydrofolate deformylase	5.40751	0.00978828
Protein secretion/export apparatus
PA4276	secE	secretion protein SecE	4.19937	0.00513012
Putative enzymes
PA2152		probable trehalose synthase	2.47984	0.00912227
PA2491		probable oxidoreductase	2.12473	0.00958539
PA3503		hypothetical protein	3.93388	0.00570765
PA3504		probable aldehyde dehydrogenase	5.21712	0.00485732
PA3507		probable short-chain dehydrogenase	5.13563	0.00412266
PA3509		probable hydrolase	5.96297	0.0027833
PA3511		probable short-chain dehydrogenase	6.77406	0.00402275
PA4986		probable oxidoreductase	2.69288	0.00570765
Secreted Factors (toxins, enzymes, alginate)
PA3478	rhlB	rhamnosyltransferase chain B	6.0085	0.003711
PA3479	rhlA	rhamnosyltransferase chain A	20.4727	0.00159891
PA5112	estA	esterase EstA	2.12328	0.00373239
Transcription, RNA processing and degradation
PA3743	trmD	tRNA (guanine-N1)-methyltransferase	17.9173	0.00335372
PA4264	rpsJ	30S ribosomal protein S10	3.32399	0.00538231
Transcriptional regulators
PA1196		probable transcriptional regulator	2.56722	0.00989123
PA3508		probable transcriptional regulator	5.84117	0.00570765
PA4296	pprB	two-component response regulator, PprB	3.32191	0.00859657
Translation, post-translational modification, degradation
PA0580	gcp	O-sialoglycoprotein endopeptidase	3.34696	0.00870108
PA0905	rsmA	RsmA, regulator of secondary metabolites	2.34608	0.00963107
PA2741	rplT	50S ribosomal protein L20	2.22965	0.00770803
PA4542	clpB	ClpB protein	2.09415	0.00990461
PA4567	rpmA	50S ribosomal protein L27	4.49603	0.00562035
PA4568	rplU	50S ribosomal protein L21	6.96745	0.00481475
PA4742	truB	tRNA pseudouridine 55 synthase	3.47234	0.00909882
PA4932	rplI	50S ribosomal protein L9	4.57615	0.00870108
PA4934	rpsR	30S ribosomal protein S18	4.2484	0.00929397
PA5316	rpmB	50S ribosomal protein L28	2.31443	0.00597447
PA5470		probable peptide chain release factor	5.04208	0.00685783
Transport of small molecules
PA1074	braC	branched-chain amino acid transport protein BraC	2.90094	0.0044489
PA1260		amino acid ABC transporter periplasmic binding protein	3.32558	0.00373239
PA1435		probable Resistance-Nodulation-Cell Division (RND) efflux membrane fusion protein precursor	5.17624	0.00450049
PA2019		Resistance-Nodulation-Cell Division (RND) multidrug efflux membrane fusion protein precursor	2.03129	0.00989176
PA2812		probable ATP-binding component of ABC transporter	3.65163	0.00240154
PA3514		probable ATP-binding component of ABC transporter	8.13867	0.00419716
PA5468		probable citrate transporter	2.69924	0.00436637
S2B
Upregulated genes
Locus Tag	Gene Name	Product Name	FC	Corrected p-value
PA4881		hypothetical protein	106.669	0.00072161
PA2570	lecA	LecA	41.6505	0.00159891
PA4354		conserved hypothetical protein	21.5444	0.00317818
PA3479	rhlA	rhamnosyltransferase chain A	20.4727	0.00159891
PA4623		hypothetical protein	20.0325	0.0013904
PA3743	trmD	tRNA (guanine-N1)-methyltransferase	17.9173	0.00335372
PA5417	soxD	sarcosine oxidase delta subunit	15.7831	0.0027833
PA1970		hypothetical protein	15.5562	0.00137808
PA5410	gbcA	GbcA	13.7664	0.00296383
PA5397		hypothetical protein	13.1454	0.0027833
PA5416	soxB	sarcosine oxidase beta subunit	11.6343	0.00294923
PA5396		hypothetical protein	11.4104	0.00353733
PA3236		probable glycine betaine-binding protein precursor	11.3087	0.0027833
PA2366		uricase PuuD	10.2043	0.00433459
PA2368		hypothetical protein	8.6232	0.0044489
PA2367		hypothetical protein	8.42419	0.0044489
PA5398	dgcA	DgcA, Dimethylglycine catabolism	8.38892	0.00214536
PA5401		hypothetical protein	8.3017	0.00456502
PA3514		probable ATP-binding component of ABC transporter	8.13867	0.00419716
PA3510		hypothetical protein	7.62027	0.00357263
PA5418	soxA	sarcosine oxidase alpha subunit	7.38446	0.00346246
PA3520		hypothetical protein	7.31388	0.00473571
PA5399	dgcB	DgcB, Dimethylglycine catabolism	7.2711	0.0027833
PA5411	gbcB	GbcB	7.09809	0.0027833
PA4568	rplU	50S ribosomal protein L21	6.96745	0.00481475
PA3511		probable short-chain dehydrogenase	6.77406	0.00402275
PA0277		conserved hypothetical protein	6.55905	0.00466136
PA5419	soxG	sarcosine oxidase gamma subunit	6.46306	0.00773947
PA0613		hypothetical protein	6.18583	0.00544899
PA3478	rhlB	rhamnosyltransferase chain B	6.0085	0.003711
PA3509		probable hydrolase	5.96297	0.0027833
PA3508		probable transcriptional regulator	5.84117	0.00570765
PA4933		hypothetical protein	5.82431	0.00880709
PA3501		hypothetical protein	5.59648	0.00667125
PA4746		conserved hypothetical protein	5.5248	0.00920432
PA5420	purU2	formyltetrahydrofolate deformylase	5.40751	0.00978828
PA3513		hypothetical protein	5.38524	0.00664935
PA3502		hypothetical protein	5.3705	0.00701457
PA3512		probable permease of ABC transporter	5.28538	0.00420613
PA5421	fdhA	glutathione-independent formaldehyde dehydrogenase	5.24783	0.00959237
PA3504		probable aldehyde dehydrogenase	5.21712	0.00485732
PA4635		conserved hypothetical protein	5.20877	0.00373239
PA1435		probable Resistance-Nodulation-Cell Division (RND) efflux membrane fusion protein precursor	5.17624	0.00450049
PA3507		probable short-chain dehydrogenase	5.13563	0.00412266
PA2762		hypothetical protein	5.12121	0.00294533
PA5471		hypothetical protein	5.05157	0.00625811
PA5470		probable peptide chain release factor	5.04208	0.00685783
PA0176	aer2	aerotaxis transducer Aer2	4.8617	0.00773947
PA0578		conserved hypothetical protein	4.74042	0.00929397
PA4940		conserved hypothetical protein	4.6249	0.00826818
PA4932	rplI	50S ribosomal protein L9	4.57615	0.00870108
PA2370		hypothetical protein	4.55435	0.00582889
PA4567	rpmA	50S ribosomal protein L27	4.49603	0.00562035
PA3745	rpsP	30S ribosomal protein S16	4.33333	0.00929397
PA4934	rpsR	30S ribosomal protein S18	4.2484	0.00929397
PA1959	bacA	bacitracin resistance protein	4.24095	0.00770803
PA3500		conserved hypothetical protein	4.20347	0.00391888
PA5400		probable electron transfer flavoprotein alpha subunit	4.20318	0.00575939
PA4276	secE	secretion protein SecE	4.19937	0.00513012
PA4880		probable bacterioferritin	4.16153	0.00912227
PA4852		conserved hypothetical protein	4.1429	0.00395033
PA5379	sdaB	L-serine dehydratase	4.13758	0.00529893
PA4124	hpcB	homoprotocatechuate 2,3-dioxygenase	3.97839	0.00880709
PA3503		hypothetical protein	3.93388	0.00570765
PA4826		hypothetical protein	3.77163	0.00733062
PA1967		hypothetical protein	3.70572	0.00826224
PA4908		hypothetical protein	3.67316	0.00580724
PA2812		probable ATP-binding component of ABC transporter	3.65163	0.00240154
PA4700	mrcB	penicillin-binding protein 1B	3.5492	0.00371406
PA3654	pyrH	uridylate kinase	3.53111	0.00624259
PA4742	truB	tRNA pseudouridine 55 synthase	3.47234	0.00909882
PA1078	flgC	flagellar basal-body rod protein FlgC	3.44371	0.0044489
PA0580	gcp	O-sialoglycoprotein endopeptidase	3.34696	0.00870108
PA1260		amino acid ABC transporter periplasmic binding protein	3.32558	0.00373239
PA4264	rpsJ	30S ribosomal protein S10	3.32399	0.00538231
PA4296	pprB	two-component response regulator, PprB	3.32191	0.00859657
PA2971		conserved hypothetical protein	3.3137	0.00191705
PA1080	flgE	flagellar hook protein FlgE	3.2875	0.00719426
PA0718		hypothetical protein of bacteriophage Pf1	3.24203	0.00958539
PA2654		probable chemotaxis transducer	3.18966	0.0027833
PA3414		hypothetical protein	3.18837	0.00851687
PA1030		hypothetical protein	3.15447	0.00838624
PA2369		hypothetical protein	3.07589	0.00711694
PA0177		probable purine-binding chemotaxis protein	3.07191	0.00987334
PA5465		hypothetical protein	3.03223	0.00664935
PA4633		probable chemotaxis transducer	3.0195	0.00353733
PA1079	flgD	flagellar basal-body rod modification protein FlgD	2.9894	0.0057846
PA1441		hypothetical protein	2.95505	0.00269214
PA2288		hypothetical protein	2.93155	0.00228129
PA1074	braC	branched-chain amino acid transport protein BraC	2.90094	0.0044489
PA4985		hypothetical protein	2.88708	0.00353733
PA0026	plcB	phospholipase C, PlcB	2.86758	0.00750979
PA3274		hypothetical protein	2.8639	0.00995442
PA4917		hypothetical protein	2.79291	0.00743344
PA1087	flgL	flagellar hook-associated protein type 3 FlgL	2.78227	0.00741064
PA0572		hypothetical protein	2.77556	0.00987334
PA5378		hypothetical protein	2.7637	0.00769127
PA1452	flhA	flagellar biosynthesis protein FlhA	2.74238	0.00847349
PA5446		hypothetical protein	2.7421	0.00912227
PA2485		hypothetical protein	2.71709	0.00912227
PA2953		electron transfer flavoprotein-ubiquinone oxidoreductase	2.70955	0.00826818
PA5468		probable citrate transporter	2.69924	0.00436637
PA4986		probable oxidoreductase	2.69288	0.00570765
PA3126	ibpA	heat-shock protein IbpA	2.68754	0.00990461
PA1029		hypothetical protein	2.66239	0.0044489
PA4359		conserved hypothetical protein	2.65332	0.00995442
PA2171		hypothetical protein	2.64974	0.00912227
PA0241		probable major facilitator superfamily (MFS) transporter	2.64648	0.00951468
PA0922		hypothetical protein	2.64587	0.00754782
PA4566	obg	GTP-binding protein Obg	2.63453	0.0041201
PA4759	dapB	dihydrodipicolinate reductase	2.62135	0.00912227
PA3691		hypothetical protein	2.59874	0.00912227
PA4310	pctB	chemotactic transducer PctB	2.59202	0.00340334
PA1073	braD	branched-chain amino acid transport protein BraD	2.58774	0.0027833
PA1646		probable chemotaxis transducer	2.57132	0.00741064
PA1196		probable transcriptional regulator	2.56722	0.00989123
PA2759		hypothetical protein	2.53626	0.00832556
PA4640	mqoB	malate:quinone oxidoreductase	2.48996	0.00431837
PA2152		probable trehalose synthase	2.47984	0.00912227
PA1095		hypothetical protein	2.46753	0.00364495
PA4763	recN	DNA repair protein RecN	2.4595	0.00657288
PA3349		probable chemotaxis protein	2.43175	0.0057846
PA3179		conserved hypothetical protein	2.43159	0.00214536
PA5429	aspA	aspartate ammonia-lyase	2.39373	0.00912227
PA0905	rsmA	RsmA, regulator of secondary metabolites	2.34608	0.00963107
PA5491		probable cytochrome	2.33029	0.00469669
PA5316	rpmB	50S ribosomal protein L28	2.31443	0.00597447
PA5409		hypothetical protein	2.31219	0.00214536
PA1093		hypothetical protein	2.26105	0.00743344
PA1096		hypothetical protein	2.25432	0.00214536
PA5395		conserved hypothetical protein	2.24747	0.00962856
PA2741	rplT	50S ribosomal protein L20	2.22965	0.00770803
PA1094	fliD	flagellar capping protein FliD	2.22834	0.00923342
PA5072		probable chemotaxis transducer	2.1945	0.00436114
PA2788		probable chemotaxis transducer	2.12575	0.00476976
PA2491		probable oxidoreductase	2.12473	0.00958539
PA5112	estA	esterase EstA	2.12328	0.00373239
PA4542	clpB	ClpB protein	2.09415	0.00990461
PA0109		hypothetical protein	2.09407	0.00733062
PA3952		hypothetical protein	2.06164	0.00912227
PA2019		Resistance-Nodulation-Cell Division (RND) multidrug efflux membrane fusion protein precursor	2.03129	0.00989176
Downregulated genes
PA2069		probable carbamoyl transferase	-35.4211	0.00265537
PA4034	aqpZ	aquaporin Z	-26.0824	0.00214536
PA5098	hutH	histidine ammonia-lyase	-21.3937	0.00214536
PA5097		probable amino acid permease	-20.6904	0.0027833
PA2300	chiC	chitinase	-20.1835	0.000416842
PA1905	phzG2	probable pyridoxamine 5'-phosphate oxidase	-19.7628	0.00344461
PA1903	phzE2	phenazine biosynthesis protein PhzE	-17.1445	0.00581017
PA1904	phzF2	probable phenazine biosynthesis protein	-15.8398	0.00398076
PA1914		conserved hypothetical protein	-14.8282	0.00711941
PA5094		probable ATP-binding component of ABC transporter	-12.6543	0.0027833
PA5093		probable histidine/phenylalanine ammonia-lyase	-12.5351	0.00373239
PA5099		probable transporter	-12.3827	0.00420613
PA2067		probable hydrolase	-12.0367	0.0017601
PA5095		probable permease of ABC transporter	-11.9896	0.00214536
PA2068		probable major facilitator superfamily (MFS) transporter	-11.7466	0.00341808
PA5096		probable binding protein component of ABC transporter	-11.5018	0.0049448
PA1902	phzD2	phenazine biosynthesis protein PhzD	-10.7387	0.00407406
PA5100	hutU	urocanase	-10.4602	0.00260954
PA5106		conserved hypothetical protein	-10.4093	0.0044489
PA5220		hypothetical protein	-9.37599	0.00471074
PA0122		conserved hypothetical protein	-9.24319	0.00660793
PA1901	phzC2	phenazine biosynthesis protein PhzC	-9.17936	0.00562035
PA4141		hypothetical protein	-8.71186	0.00328669
PA2274		hypothetical protein	-8.65234	0.00391758
PA2448		hypothetical protein	-7.93557	0.00507489
PA1871	lasA	LasA protease precursor	-7.89864	0.00679781
PA0852	cbpD	chitin-binding protein CbpD precursor	-6.71127	0.00341217
PA2327		probable permease of ABC transporter	-5.80293	0.0065746
PA1130	rhlC	rhamnosyltransferase 2	-5.39615	0.00532248
PA2066		hypothetical protein	-4.79463	0.00507489
PA4715		probable aminotransferase	-4.70636	0.00610012
PA5183		hypothetical protein	-4.31571	0.0044489
PA3734		hypothetical protein	-4.13509	0.00870108
PA0792	prpD	propionate catabolic protein PrpD	-3.84939	0.00844429
PA3930	cioA	cyanide insensitive terminal oxidase	-3.75645	0.00668992
PA0090	clpV1	ClpV1	-3.63675	0.0040167
PA4078		probable nonribosomal peptide synthetase	-3.62189	0.00407406
PA3928		hypothetical protein	-3.48601	0.00728415
PA2441		hypothetical protein	-3.4111	0.00532807
PA2223		hypothetical protein	-3.35337	0.00958539
PA1895		hypothetical protein	-3.33575	0.00371406
PA1718	pscE	type III export protein PscE	-3.17748	0.003711
PA0088		hypothetical protein	-3.15726	0.00439107
PA2619	infA	initiation factor	-2.98971	0.0044489
PA0271		hypothetical protein	-2.98148	0.0031022
PA0171		hypothetical protein	-2.97699	0.00367626
PA0075	pppA	PppA	-2.93958	0.00595762
PA1212		probable major facilitator superfamily (MFS) transporter	-2.90985	0.00730891
PA1896		hypothetical protein	-2.65175	0.00176067
PA4035		hypothetical protein	-2.63718	0.00260954
PA4241	rpsM	30S ribosomal protein S13	-2.60028	0.00903018
PA1494		conserved hypothetical protein	-2.53601	0.0049448
PA5549	glmS	glucosamine--fructose-6-phosphate aminotransferase	-2.53524	0.00228129
PA5201		conserved hypothetical protein	-2.49256	0.00214536
PA3820	secF	secretion protein SecF	-2.41936	0.00962856
PA0372		probable zinc protease	-2.30846	0.002909
PA2111		hypothetical protein	-2.27471	0.0027833
PA2684		conserved hypothetical protein	-2.20465	0.0027833
PA3700	lysS	lysyl-tRNA synthetase	-2.12779	0.0057846
PA3229		hypothetical protein	-2.11767	0.00466136
PA3361	lecB	fucose-binding lectin PA-IIL	-2.07591	0.00912227
PA0130		probable aldehyde dehydrogenase	-2.05051	0.00912227
PA0070		hypothetical protein	-2.04678	0.00724362
PA0603		probable ATP-binding component of ABC transporter	-2.00354	0.00773947
PA4238	rpoA	DNA-directed RNA polymerase alpha chain	-2.00211	0.00391346
