# Supplementary material for: The Regulatory Repertoire of Pseudomonas aeruginosa AmpC ß-Lactamase Regulator AmpR Includes Virulence Genes
Source: PLoS One. 2012 Mar 29;7(3):e34067. doi: 10.1371/journal.pone.0034067 (PMC3315558; doi:10.1371/journal.pone.0034067)
Supplement: Table S4 — AmpR, ß-lactam-dependent genes. The 207 genes that are specifically dependent on AmpR, and ß-lactam stress are separated into upregulated and downregulated genes with the corresponding corrected p-values for the fold change (FC) observed. The genes are arranged based on either (A) functional categorization, or (B) fold change. Locus tag annotations are from the Pseudomonas Genome database [31]. (XLSX) [file pone.0034067.s004.xlsx]

## Sheet: Table S4
Table S4: AmpR, ß-lactam-dependent genes. The 207 genes that are specifically dependent on AmpR, and ß-lactam stress are separated into upregulated and downregulated genes with the corresponding corrected p-values for the fold change (FC) observed. The genes are arranged based on either (A) functional categorization, or (B) fold change. Locus tag annotations are from the Pseudomonas Genome databa…
A
Downregulated genes
Locus Tag	Gene Name	Product Name	FC	Corrected p-value
Adaptation, Protection
PA4671		probable ribosomal protein L25	-2.61629	0.00907317
Amino acid biosynthesis and metabolism
PA0390	metX	homoserine O-acetyltransferase	-2.50943	0.00629444
PA0932	cysM	cysteine synthase B	-2.0296	0.00290475
PA1750		phospho-2-dehydro-3-deoxyheptonate aldolase	-2.3786	0.00853228
PA4846	aroQ1	3-dehydroquinate dehydratase	-2.26669	0.00678698
Biosynthesis of cofactors, prosthetic groups and carriers
PA0024	hemF	coproporphyrinogen III oxidase, aerobic	-3.17352	0.006646
PA4280	birA	BirA bifunctional protein	-2.95696	0.00914346
PA5118	thiI	thiazole biosynthesis protein ThiI	-2.8713	0.00795178
PA3652	uppS	undecaprenyl pyrophosphate synthetase	-2.30955	0.006646
PA0342	thyA	thymidylate synthase	-2.0768	0.00898512
Carbon compound catabolism
PA0227		probable CoA transferase, subunit B	-3.10516	0.006646
PA5192	pckA	phosphoenolpyruvate carboxykinase	-2.95497	0.000603899
PA4670	prs	ribose-phosphate pyrophosphokinase	-3.95689	0.00910087
Cell division
PA5563	soj	chromosome partitioning protein Soj	-2.05221	0.00970652
Cell wall / LPS / capsule
PA4450	murA	UDP-N-acetylglucosamine 1-carboxyvinyltransferase	-2.14113	0.00973135
PA4545	comL	competence protein ComL	-2.09731	0.00795178
PA4481	mreB	rod shape-determining protein MreB	-4.37698	0.00651431
Central intermediary metabolism
PA4563	rpsT	30S ribosomal protein S20	-5.88628	0.00991843
Chaperones & heat shock proteins
PA5193	yrfI	heat shock protein HSP33	-2.51956	0.006646
DNA replication, recombination, modification and repair
PA3620	mutS	DNA mismatch repair protein MutS	-2.5522	0.00921911
Hypothetical, unclassified, unknown
PA0045		hypothetical protein	-4.16351	0.007484
PA0046		hypothetical protein	-3.44858	0.00910087
PA1768		hypothetical protein	-3.40934	0.00786448
PA2318		hypothetical protein	-3.09646	0.00853261
PA2427		hypothetical protein	-2.22917	0.00912227
PA2451		hypothetical protein	-2.16921	0.00958379
PA2486		hypothetical protein	-4.02472	0.00700072
PA2660		hypothetical protein	-2.63722	0.00972741
PA2823		conserved hypothetical protein	-2.00429	0.00910087
PA3453		conserved hypothetical protein	-2.80628	0.0093411
PA3472		hypothetical protein	-5.41919	0.00853228
PA3483		hypothetical protein	-2.00068	0.0070933
PA3664		conserved hypothetical protein	-2.13265	0.00795178
PA3906		hypothetical protein	-2.43701	0.00939367
PA3908		hypothetical protein	-2.16231	0.00786448
PA4004		conserved hypothetical protein	-2.70977	0.006646
PA4122		conserved hypothetical protein	-3.01858	0.00753156
PA4438		conserved hypothetical protein	-3.3653	0.006646
PA4451		conserved hypothetical protein	-3.69013	0.0070933
PA4460		conserved hypothetical protein	-2.08492	0.00844345
PA4492		conserved hypothetical protein	-2.21772	0.00857253
PA4574		conserved hypothetical protein	-2.24274	0.00632513
PA4673		conserved hypothetical protein	-2.79661	0.0070933
PA4753		conserved hypothetical protein	-2.31806	0.00809212
PA4817		hypothetical protein	-2.01198	0.007484
PA5441		hypothetical protein	-2.01519	0.0070933
Membrane proteins
PA3794		hypothetical protein	-2.29574	0.00436619
PA3828		conserved hypothetical protein	-2.65706	0.0092421
PA5568		conserved hypothetical protein	-3.18798	0.00634761
PA4205	mexG	hypothetical protein	-30.156	0.00117852
PA4207	mexI	probable Resistance-Nodulation-Cell Division (RND) efflux transporter	-10.8207	0.0022858
PA4208	opmD	probable outer membrane protein precursor	-10.8103	0.00159891
PA4292		probable phosphate transporter	-2.37633	0.00910087
Nucleotide biosynthesis and metabolism
PA0944	purN	phosphoribosylaminoimidazole synthetase	-2.18479	0.00973135
PA3527	pyrC	dihydroorotase	-2.45333	0.0080862
PA5298		xanthine phosphoribosyltransferase	-3.15173	0.00974847
PA5336	gmk	guanylate kinase	-2.97767	0.00886228
Protein secretion/export apparatus
PA1708	popB	translocator protein PopB	-2.03054	0.00963107
PA5128	secB	secretion protein SecB	-2.549	0.00743372
Putative enzymes
PA0386		probable oxidase	-2.3983	0.0073284
PA4073		probable aldehyde dehydrogenase	-3.3053	0.00833051
PA4209	phzM	probable phenazine-specific methyltransferase	-3.82967	0.00395033
PA4217	phzS	flavin-containing monooxygenase	-28.0114	0.00290062
PA4389		probable short-chain dehydrogenase	-2.08728	0.00786448
Secreted Factors (toxins, enzymes, alginate)
PA4210	phzA1	probable phenazine biosynthesis protein	-3.53751	0.00381263
PA4211	phzB1	probable phenazine biosynthesis protein	-20.6827	0.00511023
Transcription, RNA processing and degradation
PA0592	ksgA	rRNA (adenine-N6,N6)-dimethyltransferase	-2.57632	0.00856041
PA4745	nusA	N utilization substance protein A	-2.26014	0.00839099
PA4262	rplD	50S ribosomal protein L4	-2.98268	0.00632513
Transcriptional regulators
PA4853	fis	DNA-binding protein Fis	-3.33094	0.006646
PA0463	creB	two-component response regulator CreB	-2.14423	0.00839099
PA3604		probable two-component response regulator	-2.20907	0.00695811
Translation, post-translational modification, degradation
PA0579	rpsU	30S ribosomal protein S21	-3.46944	0.0093167
PA2851	efp	translation elongation factor P	-4.31259	0.00695811
PA2970	rpmF	50S ribosomal protein L32	-3.84034	0.00734122
PA3656	rpsB	30S ribosomal protein S2	-3.95408	0.0093411
PA3742	rplS	50S ribosomal protein L19	-2.74433	0.00683122
PA4239	rpsD	30S ribosomal protein S4	-2.43267	0.00651431
PA4244	rplO	50S ribosomal protein L15	-2.64116	0.00600928
PA4246	rpsE	30S ribosomal protein S5	-2.42747	0.00436619
PA4247	rplR	50S ribosomal protein L18	-2.92663	0.00753156
PA4248	rplF	50S ribosomal protein L6	-2.69817	0.00889823
PA4249	rpsH	30S ribosomal protein S8	-2.80815	0.00657594
PA4251	rplE	50S ribosomal protein L5	-2.3991	0.00632513
PA4253	rplN	50S ribosomal protein L14	-3.03194	0.00910087
PA4254	rpsQ	30S ribosomal protein S17	-2.41304	0.00436619
PA4257	rpsC	30S ribosomal protein S3	-2.65548	0.00889823
PA4261	rplW	50S ribosomal protein L23	-2.85415	0.00380675
PA4263	rplC	50S ribosomal protein L3	-2.79729	0.00694342
PA4266	fusA1	elongation factor G	-2.07921	0.00973135
PA4272	rplJ	50S ribosomal protein L10	-3.70011	0.00632513
PA4274	rplK	50S ribosomal protein L11	-2.0313	0.00503344
PA4665	prfA	peptide chain release factor 1	-2.2106	0.006646
PA4672		peptidyl-tRNA hydrolase	-3.28938	0.00910087
PA4935	rpsF	30S ribosomal protein S6	-3.68091	0.00673868
PA5049	rpmE	50S ribosomal protein L31	-4.02563	0.00829409
PA5569	rnpA	ribonuclease P protein component	-3.45598	0.00503089
PA3818		extragenic suppressor protein SuhB	-2.66343	0.00910087
PA4743	rbfA	ribosome-binding factor A	-2.76883	0.0093411
Transport of small molecules
PA2983		probable tolQ-type transport protein	-2.67596	0.00673868
PA3407	hasAp	heme acquisition protein HasAp	-15.7811	0.0013904
Upregulated genes
Locus Tag	Gene Name	Product Name	FC	Corrected p-value
Adaptation, Protection
PA1001	phnA	anthranilate synthase component I	5.68594	0.00731041
PA2573		probable chemotaxis transducer	4.27731	0.00519433
PA3866		pyocin protein	2.07892	0.0093411
PA4110	ampC	beta-lactamase precursor	2	0.0384
Amino acid biosynthesis and metabolism
PA1217		probable 2-isopropylmalate synthase	13.7776	0.00651431
PA3418	ldh	leucine dehydrogenase	5.06764	0.00829409
PA1002	phnB	anthranilate synthase component II	4.74719	0.00530093
Biosynthesis of cofactors, prosthetic groups and carriers
PA0502		probable biotin biosynthesis protein bioH	2.26131	0.00753209
PA1000	pqsE	Quinolone signal response protein	3.64731	0.00694342
Carbon compound catabolism
PA0743		probable 3-hydroxyisobutyrate dehydrogenase	6.12813	0.00809506
PA2290	gcd	glucose dehydrogenase	3.89382	0.00489384
Central intermediary metabolism
PA4130		probable sulfite or nitrite reductase	3.36834	0.00910087
Energy metabolism
PA1177	napE	periplasmic nitrate reductase protein NapE	5.45754	0.00853228
PA1317	cyoA	cytochrome o ubiquinol oxidase subunit II	3.88897	0.00850803
PA3032	snr1	cytochrome c Snr1	5.16854	0.00380675
PA3415		probable dihydrolipoamide acetyltransferase	8.062	0.00651431
PA3416		probable pyruvate dehydrogenase E1 component, beta chain	8.18742	0.00695811
Hypothetical, unclassified, unknown
PA0028		hypothetical protein	2.46328	0.00854834
PA0484		conserved hypothetical protein	3.91826	0.00678698
PA0586		conserved hypothetical protein	4.66302	0.00632513
PA0587		conserved hypothetical protein	4.47501	0.00910087
PA0588		conserved hypothetical protein	3.61944	0.00861049
PA0959		hypothetical protein	2.28778	0.00892756
PA1043		hypothetical protein	2.32683	0.006646
PA1088		hypothetical protein	3.13155	0.00973135
PA1090		hypothetical protein	2.55909	0.00503089
PA1091	fgtA	flagellar glycosyl transferase, FgtA	3.09291	0.00360133
PA1135		conserved hypothetical protein	3.78882	0.00556882
PA1213		hypothetical protein	5.50422	0.00530093
PA1214		hypothetical protein	4.87711	0.00855112
PA1216		hypothetical protein	15.8801	0.00698981
PA1218		hypothetical protein	10.8138	0.00700072
PA1219		hypothetical protein	5.01316	0.00436619
PA1221		hypothetical protein	4.8718	0.00614544
PA1356		hypothetical protein	2.60064	0.00786852
PA1728		hypothetical protein	4.99703	0.00853261
PA1784		hypothetical protein	6.26212	0.00683122
PA1887		hypothetical protein	9.82097	0.00753156
PA1888		hypothetical protein	11.9845	0.00786448
PA2166		hypothetical protein	8.92886	0.00556882
PA2174		hypothetical protein	5.29773	0.00910087
PA2226		hypothetical protein	2.51678	0.00816215
PA2328		hypothetical protein	8.74169	0.00104473
PA2330		hypothetical protein	17.4962	0.00829409
PA2374		hypothetical protein	4.11981	0.00695811
PA2381		hypothetical protein	7.49349	0.00844345
PA2566		conserved hypothetical protein	4.00221	0.0093411
PA2699		hypothetical protein	3.8874	0.00910087
PA2747		hypothetical protein	12.0824	0.00731041
PA2937		hypothetical protein	4.26315	0.00853228
PA3089		hypothetical protein	2.8661	0.0094995
PA3688		hypothetical protein	4.9199	0.00910087
PA4132		conserved hypothetical protein	2.39308	0.00780755
PA4298		hypothetical protein	14.0662	0.00829409
PA4362		hypothetical protein	3.13939	0.00856041
PA4421		conserved hypothetical protein	2.08341	0.00736699
PA4573		hypothetical protein	4.23959	0.00950773
PA4583		conserved hypothetical protein	2.12337	0.00912227
PA4608		hypothetical protein	2.84828	0.00973135
PA4648		hypothetical protein	13.4895	0.00436619
PA4650		hypothetical protein	2.14518	0.006646
PA4653		hypothetical protein	3.78294	0.00360133
PA4685		hypothetical protein	2.56678	0.00503089
PA4702		hypothetical protein	6.34896	0.00436619
PA4738		conserved hypothetical protein	15.5739	0.000730029
PA4739		conserved hypothetical protein	16.7747	0.006646
PA5061		conserved hypothetical protein	4.20785	0.00651431
PA5101		hypothetical protein	3.18548	0.00855112
PA5191		hypothetical protein	2.24056	0.00823377
PA5481		hypothetical protein	5.88359	0.00741525
PA1874		hypothetical protein	22.1317	0.0050892
Membrane proteins
PA0007		hypothetical protein	2.59151	0.00973135
PA1042		conserved hypothetical protein	2.68711	0.00904697
PA1119		probable outer membrane protein precursor	2.20032	0.00921911
PA2072		conserved hypothetical protein	2.22261	0.00979885
PA3370		hypothetical protein	3.7479	0.00786448
PA3789		hypothetical protein	2.92813	0.0070933
PA5482		hypothetical protein	11.0743	0.006646
PA4614	mscL	conductance mechanosensitive channel	2.31398	0.00556882
PA4297	tadG	TadG	3.45026	0.00763875
PA4301	tadB	TadB	3.96581	0.00632513
Motility & Attachment
PA4299	tadD	TadD	16.9213	0.00503089
PA4305	rcpC	RcpC	4.61211	0.00973135
PA4306	flp	Type IVb pilin, Flp	35.6548	0.00360133
PA4651		probable pili assembly chaperone	11.5755	0.00142009
Protein secretion/export apparatus
PA1877		probable secretion protein	8.57572	0.00973135
PA1875		probable outer membrane protein precursor	11.4761	0.00853261
PA4302	tadA	TadA ATPase	7.13268	0.00651431
PA4304	rcpA	RcpA	8.71531	0.00732977
Putative enzymes
PA0704		probable amidase	3.56745	0.00856041
PA0804		probable oxidoreductase	2.49436	0.00910087
PA0838		probable glutathione peroxidase	2.40751	0.0093411
PA1880		probable oxidoreductase	4.11417	0.0094995
PA2024		probable ring-cleaving dioxygenase	6.11837	0.0024628
PA5546		conserved hypothetical protein	4.6015	0.0070933
Related to phage, transposon, or plasmid
PA0644		hypothetical protein	5.03131	0.00973135
Secreted Factors (toxins, enzymes, alginate)
PA4175	piv	protease IV	3.80506	0.0094995
PA1876		probable ATP-binding/permease fusion ABC transporter	9.01499	0.00556882
Transcription, RNA processing and degradation
PA4585	rtcA	RNA 3'-terminal phosphate cyclase	2.14454	0.00912227
Transcriptional regulators
PA3622	rpoS	sigma factor RpoS	2.24816	0.006646
PA5059		probable transcriptional regulator	3.96402	0.00632513
PA0175		probable chemotaxis protein methyltransferase	5.92314	0.00503089
PA4781		probable two-component response regulator	2.84766	0.00910087
PA2329		probable ATP-binding component of ABC transporter	14.7132	0.00753209
PA3858		probable amino acid-binding protein	2.29464	0.00519433
PA4497		probable binding protein component of ABC transporter	2.31342	0.00978208
Two-component regulatory systems
PA4293	pprA	two-component sensor PprA	4.13021	0.00889823
B
Upregulated genes
Locus Tag	Gene Name	Product Name	FC	Corrected p-value
PA4306	flp	Type IVb pilin, Flp	35.6548	0.00360133
PA1874		hypothetical protein	22.1317	0.0050892
PA2330		hypothetical protein	17.4962	0.00829409
PA4299	tadD	TadD	16.9213	0.00503089
PA4739		conserved hypothetical protein	16.7747	0.006646
PA1216		hypothetical protein	15.8801	0.00698981
PA4738		conserved hypothetical protein	15.5739	0.000730029
PA2329		probable ATP-binding component of ABC transporter	14.7132	0.00753209
PA4298		hypothetical protein	14.0662	0.00829409
PA1217		probable 2-isopropylmalate synthase	13.7776	0.00651431
PA4648		hypothetical protein	13.4895	0.00436619
PA2747		hypothetical protein	12.0824	0.00731041
PA1888		hypothetical protein	11.9845	0.00786448
PA4651		probable pili assembly chaperone	11.5755	0.00142009
PA1875		probable outer membrane protein precursor	11.4761	0.00853261
PA5482		hypothetical protein	11.0743	0.006646
PA1218		hypothetical protein	10.8138	0.00700072
PA1887		hypothetical protein	9.82097	0.00753156
PA1876		probable ATP-binding/permease fusion ABC transporter	9.01499	0.00556882
PA2166		hypothetical protein	8.92886	0.00556882
PA2328		hypothetical protein	8.74169	0.00104473
PA4304	rcpA	RcpA	8.71531	0.00732977
PA1877		probable secretion protein	8.57572	0.00973135
PA3416		probable pyruvate dehydrogenase E1 component, beta chain	8.18742	0.00695811
PA3415		probable dihydrolipoamide acetyltransferase	8.062	0.00651431
PA2381		hypothetical protein	7.49349	0.00844345
PA4302	tadA	TadA ATPase	7.13268	0.00651431
PA4702		hypothetical protein	6.34896	0.00436619
PA1784		hypothetical protein	6.26212	0.00683122
PA0743		probable 3-hydroxyisobutyrate dehydrogenase	6.12813	0.00809506
PA2024		probable ring-cleaving dioxygenase	6.11837	0.0024628
PA0175		probable chemotaxis protein methyltransferase	5.92314	0.00503089
PA5481		hypothetical protein	5.88359	0.00741525
PA1001	phnA	anthranilate synthase component I	5.68594	0.00731041
PA1213		hypothetical protein	5.50422	0.00530093
PA1177	napE	periplasmic nitrate reductase protein NapE	5.45754	0.00853228
PA2174		hypothetical protein	5.29773	0.00910087
PA3032	snr1	cytochrome c Snr1	5.16854	0.00380675
PA3418	ldh	leucine dehydrogenase	5.06764	0.00829409
PA0644		hypothetical protein	5.03131	0.00973135
PA1219		hypothetical protein	5.01316	0.00436619
PA1728		hypothetical protein	4.99703	0.00853261
PA3688		hypothetical protein	4.9199	0.00910087
PA1214		hypothetical protein	4.87711	0.00855112
PA1221		hypothetical protein	4.8718	0.00614544
PA1002	phnB	anthranilate synthase component II	4.74719	0.00530093
PA0586		conserved hypothetical protein	4.66302	0.00632513
PA4305	rcpC	RcpC	4.61211	0.00973135
PA5546		conserved hypothetical protein	4.6015	0.0070933
PA0587		conserved hypothetical protein	4.47501	0.00910087
PA2573		probable chemotaxis transducer	4.27731	0.00519433
PA2937		hypothetical protein	4.26315	0.00853228
PA4573		hypothetical protein	4.23959	0.00950773
PA5061		conserved hypothetical protein	4.20785	0.00651431
PA4293	pprA	two-component sensor PprA	4.13021	0.00889823
PA2374		hypothetical protein	4.11981	0.00695811
PA1880		probable oxidoreductase	4.11417	0.0094995
PA2566		conserved hypothetical protein	4.00221	0.0093411
PA4301	tadB	TadB	3.96581	0.00632513
PA5059		probable transcriptional regulator	3.96402	0.00632513
PA0484		conserved hypothetical protein	3.91826	0.00678698
PA2290	gcd	glucose dehydrogenase	3.89382	0.00489384
PA1317	cyoA	cytochrome o ubiquinol oxidase subunit II	3.88897	0.00850803
PA2699		hypothetical protein	3.8874	0.00910087
PA4175	piv	protease IV	3.80506	0.0094995
PA1135		conserved hypothetical protein	3.78882	0.00556882
PA4653		hypothetical protein	3.78294	0.00360133
PA3370		hypothetical protein	3.7479	0.00786448
PA1000	pqsE	Quinolone signal response protein	3.64731	0.00694342
PA0588		conserved hypothetical protein	3.61944	0.00861049
PA0704		probable amidase	3.56745	0.00856041
PA4297	tadG	TadG	3.45026	0.00763875
PA4130		probable sulfite or nitrite reductase	3.36834	0.00910087
PA5101		hypothetical protein	3.18548	0.00855112
PA4362		hypothetical protein	3.13939	0.00856041
PA1088		hypothetical protein	3.13155	0.00973135
PA1091	fgtA	flagellar glycosyl transferase, FgtA	3.09291	0.00360133
PA3789		hypothetical protein	2.92813	0.0070933
PA3089		hypothetical protein	2.8661	0.0094995
PA4608		hypothetical protein	2.84828	0.00973135
PA4781		probable two-component response regulator	2.84766	0.00910087
PA1042		conserved hypothetical protein	2.68711	0.00904697
PA1356		hypothetical protein	2.60064	0.00786852
PA0007		hypothetical protein	2.59151	0.00973135
PA4685		hypothetical protein	2.56678	0.00503089
PA1090		hypothetical protein	2.55909	0.00503089
PA2226		hypothetical protein	2.51678	0.00816215
PA0804		probable oxidoreductase	2.49436	0.00910087
PA0028		hypothetical protein	2.46328	0.00854834
PA0838		probable glutathione peroxidase	2.40751	0.0093411
PA4132		conserved hypothetical protein	2.39308	0.00780755
PA1043		hypothetical protein	2.32683	0.006646
PA4614	mscL	conductance mechanosensitive channel	2.31398	0.00556882
PA4497		probable binding protein component of ABC transporter	2.31342	0.00978208
PA3858		probable amino acid-binding protein	2.29464	0.00519433
PA0959		hypothetical protein	2.28778	0.00892756
PA0502		probable biotin biosynthesis protein bioH	2.26131	0.00753209
PA3622	rpoS	sigma factor RpoS	2.24816	0.006646
PA5191		hypothetical protein	2.24056	0.00823377
PA2072		conserved hypothetical protein	2.22261	0.00979885
PA1119		probable outer membrane protein precursor	2.20032	0.00921911
PA4650		hypothetical protein	2.14518	0.006646
PA4585	rtcA	RNA 3'-terminal phosphate cyclase	2.14454	0.00912227
PA4583		conserved hypothetical protein	2.12337	0.00912227
PA4421		conserved hypothetical protein	2.08341	0.00736699
PA3866		pyocin protein	2.07892	0.0093411
PA4110	ampC	beta-lactamase precursor	2	0.0384
Downregulated genes
PA4205	mexG	hypothetical protein	-30.156	0.00117852
PA4217	phzS	flavin-containing monooxygenase	-28.0114	0.00290062
PA4211	phzB1	probable phenazine biosynthesis protein	-20.6827	0.00511023
PA3407	hasAp	heme acquisition protein HasAp	-15.7811	0.0013904
PA4207	mexI	probable Resistance-Nodulation-Cell Division (RND) efflux transporter	-10.8207	0.0022858
PA4208	opmD	probable outer membrane protein precursor	-10.8103	0.00159891
PA4563	rpsT	30S ribosomal protein S20	-5.88628	0.00991843
PA3472		hypothetical protein	-5.41919	0.00853228
PA4481	mreB	rod shape-determining protein MreB	-4.37698	0.00651431
PA2851	efp	translation elongation factor P	-4.31259	0.00695811
PA0045		hypothetical protein	-4.16351	0.007484
PA5049	rpmE	50S ribosomal protein L31	-4.02563	0.00829409
PA2486		hypothetical protein	-4.02472	0.00700072
PA4670	prs	ribose-phosphate pyrophosphokinase	-3.95689	0.00910087
PA3656	rpsB	30S ribosomal protein S2	-3.95408	0.0093411
PA2970	rpmF	50S ribosomal protein L32	-3.84034	0.00734122
PA4209	phzM	probable phenazine-specific methyltransferase	-3.82967	0.00395033
PA4272	rplJ	50S ribosomal protein L10	-3.70011	0.00632513
PA4451		conserved hypothetical protein	-3.69013	0.0070933
PA4935	rpsF	30S ribosomal protein S6	-3.68091	0.00673868
PA4210	phzA1	probable phenazine biosynthesis protein	-3.53751	0.00381263
PA0579	rpsU	30S ribosomal protein S21	-3.46944	0.0093167
PA5569	rnpA	ribonuclease P protein component	-3.45598	0.00503089
PA0046		hypothetical protein	-3.44858	0.00910087
PA1768		hypothetical protein	-3.40934	0.00786448
PA4438		conserved hypothetical protein	-3.3653	0.006646
PA4853	fis	DNA-binding protein Fis	-3.33094	0.006646
PA4073		probable aldehyde dehydrogenase	-3.3053	0.00833051
PA4672		peptidyl-tRNA hydrolase	-3.28938	0.00910087
PA5568		conserved hypothetical protein	-3.18798	0.00634761
PA0024	hemF	coproporphyrinogen III oxidase, aerobic	-3.17352	0.006646
PA5298		xanthine phosphoribosyltransferase	-3.15173	0.00974847
PA0227		probable CoA transferase, subunit B	-3.10516	0.006646
PA2318		hypothetical protein	-3.09646	0.00853261
PA4253	rplN	50S ribosomal protein L14	-3.03194	0.00910087
PA4122		conserved hypothetical protein	-3.01858	0.00753156
PA4262	rplD	50S ribosomal protein L4	-2.98268	0.00632513
PA5336	gmk	guanylate kinase	-2.97767	0.00886228
PA4280	birA	BirA bifunctional protein	-2.95696	0.00914346
PA5192	pckA	phosphoenolpyruvate carboxykinase	-2.95497	0.000603899
PA4247	rplR	50S ribosomal protein L18	-2.92663	0.00753156
PA5118	thiI	thiazole biosynthesis protein ThiI	-2.8713	0.00795178
PA4261	rplW	50S ribosomal protein L23	-2.85415	0.00380675
PA4249	rpsH	30S ribosomal protein S8	-2.80815	0.00657594
PA3453		conserved hypothetical protein	-2.80628	0.0093411
PA4263	rplC	50S ribosomal protein L3	-2.79729	0.00694342
PA4673		conserved hypothetical protein	-2.79661	0.0070933
PA4743	rbfA	ribosome-binding factor A	-2.76883	0.0093411
PA3742	rplS	50S ribosomal protein L19	-2.74433	0.00683122
PA4004		conserved hypothetical protein	-2.70977	0.006646
PA4248	rplF	50S ribosomal protein L6	-2.69817	0.00889823
PA2983		probable tolQ-type transport protein	-2.67596	0.00673868
PA3818		extragenic suppressor protein SuhB	-2.66343	0.00910087
PA3828		conserved hypothetical protein	-2.65706	0.0092421
PA4257	rpsC	30S ribosomal protein S3	-2.65548	0.00889823
PA4244	rplO	50S ribosomal protein L15	-2.64116	0.00600928
PA2660		hypothetical protein	-2.63722	0.00972741
PA4671		probable ribosomal protein L25	-2.61629	0.00907317
PA0592	ksgA	rRNA (adenine-N6,N6)-dimethyltransferase	-2.57632	0.00856041
PA3620	mutS	DNA mismatch repair protein MutS	-2.5522	0.00921911
PA5128	secB	secretion protein SecB	-2.549	0.00743372
PA5193	yrfI	heat shock protein HSP33	-2.51956	0.006646
PA0390	metX	homoserine O-acetyltransferase	-2.50943	0.00629444
PA3527	pyrC	dihydroorotase	-2.45333	0.0080862
PA3906		hypothetical protein	-2.43701	0.00939367
PA4239	rpsD	30S ribosomal protein S4	-2.43267	0.00651431
PA4246	rpsE	30S ribosomal protein S5	-2.42747	0.00436619
PA4254	rpsQ	30S ribosomal protein S17	-2.41304	0.00436619
PA4251	rplE	50S ribosomal protein L5	-2.3991	0.00632513
PA0386		probable oxidase	-2.3983	0.0073284
PA1750		phospho-2-dehydro-3-deoxyheptonate aldolase	-2.3786	0.00853228
PA4292		probable phosphate transporter	-2.37633	0.00910087
PA4753		conserved hypothetical protein	-2.31806	0.00809212
PA3652	uppS	undecaprenyl pyrophosphate synthetase	-2.30955	0.006646
PA3794		hypothetical protein	-2.29574	0.00436619
PA4846	aroQ1	3-dehydroquinate dehydratase	-2.26669	0.00678698
PA4745	nusA	N utilization substance protein A	-2.26014	0.00839099
PA4574		conserved hypothetical protein	-2.24274	0.00632513
PA2427		hypothetical protein	-2.22917	0.00912227
PA4492		conserved hypothetical protein	-2.21772	0.00857253
PA4665	prfA	peptide chain release factor 1	-2.2106	0.006646
PA3604		probable two-component response regulator	-2.20907	0.00695811
PA0944	purN	phosphoribosylaminoimidazole synthetase	-2.18479	0.00973135
PA2451		hypothetical protein	-2.16921	0.00958379
PA3908		hypothetical protein	-2.16231	0.00786448
PA0463	creB	two-component response regulator CreB	-2.14423	0.00839099
PA4450	murA	UDP-N-acetylglucosamine 1-carboxyvinyltransferase	-2.14113	0.00973135
PA3664		conserved hypothetical protein	-2.13265	0.00795178
PA4545	comL	competence protein ComL	-2.09731	0.00795178
PA4389		probable short-chain dehydrogenase	-2.08728	0.00786448
PA4460		conserved hypothetical protein	-2.08492	0.00844345
PA4266	fusA1	elongation factor G	-2.07921	0.00973135
PA0342	thyA	thymidylate synthase	-2.0768	0.00898512
PA5563	soj	chromosome partitioning protein Soj	-2.05221	0.00970652
PA4274	rplK	50S ribosomal protein L11	-2.0313	0.00503344
PA1708	popB	translocator protein PopB	-2.03054	0.00963107
PA0932	cysM	cysteine synthase B	-2.0296	0.00290475
PA5441		hypothetical protein	-2.01519	0.0070933
PA4817		hypothetical protein	-2.01198	0.007484
PA2823		conserved hypothetical protein	-2.00429	0.00910087
PA3483		hypothetical protein	-2.00068	0.0070933
