# Supplementary material for: The Regulatory Repertoire of Pseudomonas aeruginosa AmpC ß-Lactamase Regulator AmpR Includes Virulence Genes
Source: PLoS One. 2012 Mar 29;7(3):e34067. doi: 10.1371/journal.pone.0034067 (PMC3315558; doi:10.1371/journal.pone.0034067)
Supplement: Table S5 — Regulation of QS-related genes by AmpR. List of genes that are significantly differentially regulated in PAO1 and PAOΔampR in the presence and absence of ß-lactam stress. For sake of clarity, only significant fold changes (FC) and their corresponding corrected p-values in the various conditions are shown. Annotations for the locus tags are from the Pseudomonas Genome database [31]. (XLSX) [file pone.0034067.s005.xlsx]

## Sheet: Table S5
Table S5: Regulation of QS-related genes by AmpR. List of genes that are significantly differentially regulated in PAO1 and PAO∆ampR in the presence and absence of ß-lactam stress. For sake of clarity, only significant fold changes (FC) and their corresponding corrected p-values in the various conditions are shown. Annotations for the locus tags are from the Pseudomonas Genome database (31).
Locus Tag	Gene Name	Product Name	AmpR dependent		AmpR, ß-lactam dependent
			FC	p-value	FC	p-value
Adaptation, protection
PA4520		probable chemotaxis transducer	2.08624	0.00368951
PA1127		probable oxidoreductase	-2.00194	0.00473571
Amino acid biosynthesis and metabolism
PA0132		beta-alanine--pyruvate transaminase	-3.89285	0.00929397
PA1812	mltD	membrane-bound lytic murein transglycosylase D precursor	-2.09119	0.00532465
PA2629	purB	adenylosuccinate lyase	-2.316	0.00989176
Carbon compound catabolism
PA0153	pcaH	protocatechuate 3,4-dioxygenase, beta subunit	3.29358	0.00341808
PA0154	pcaG	protocatechuate 3,4-dioxygenase, alpha subunit	2.21623	0.00624727
PA0226		probable CoA transferase, subunit A	4.44884	0.00997414
PA4123	hpcC	5-carboxy-2-hydroxymuconate semialdehyde dehydrogenase	6.68517	0.00317818
PA4125	hpcD	5-carboxymethyl-2-hydroxymuconate isomerase	5.7906	0.00611776
PA0227		probable CoA transferase, subunit B			-3.10516	0.006646
Cell wall / LPS / capsule
PA5163	rmlA	glucose-1-phosphate thymidylyltransferase	-2.05939	0.00466136
Central intermediary metabolism
PA4130		probable sulfite or nitrite reductase			3.36834	0.00910087
Energy metabolism
PA0105	coxB	cytochrome c oxidase, subunit II	2.53742	0.00821387
PA3621	fdxA	ferredoxin I	3.10997	0.00532248
PA3032	snr1	cytochrome c Snr1			5.16854	0.00380675
PA0854	fumC2	fumarate hydratase	-2.42935	0.00959237
Hypothetical, unclassified, unknown
PA0079		hypothetical protein	-2.9454	0.00597267
PA0080		hypothetical protein	-2.52397	0.0049448
PA0269		conserved hypothetical protein	-3.44682	0.00317818
PA0270		hypothetical protein	-3.01664	0.00885059
PA0468		hypothetical protein	-2.24376	0.00611663
PA0614		hypothetical protein	6.66488	0.00826224
PA0615		hypothetical protein	6.46894	0.0057846
PA0910		hypothetical protein	8.46397	0.00625811
PA0943		hypothetical protein	-2.04837	0.0036526
PA1892		hypothetical protein	-2.59933	0.00929397
PA2030		hypothetical protein	-4.11264	0.00888639
PA2031		hypothetical protein	-3.21087	0.00870108
PA2780		hypothetical protein	2.62583	0.00466136
PA3572		hypothetical protein	-4.72517	0.00185871
PA3880		conserved hypothetical protein	2.43579	0.00562035
PA4121		conserved hypothetical protein	4.85752	0.00674956
PA5543		hypothetical protein	2.04338	0.00580724
PA1768		hypothetical protein			-3.40934	0.00786448
PA1784		hypothetical protein			6.26212	0.00683122
PA2328		hypothetical protein			8.74169	0.00104473
PA2330		hypothetical protein			17.4962	0.00829409
PA2566		conserved hypothetical protein			4.00221	0.0093411
PA2660		hypothetical protein			-2.63722	0.00972741
PA4122		conserved hypothetical protein			-3.01858	0.00753156
PA4132		conserved hypothetical protein			2.39308	0.00780755
PA4298		hypothetical protein			14.0662	0.00829409
PA4817		hypothetical protein			-2.01198	0.007484
PA1897		hypothetical protein	-2.77539	0.00599582
PA0717		hypothetical protein of bacteriophage Pf1	3.5004	0.00344461
Membrane proteins
PA3789		hypothetical protein			2.92813	0.0070933
PA4126		probable major facilitator superfamily (MFS) transporter	2.43921	0.00920432
PA4297	tadG	TadG			3.45026	0.00763875
PA1072	braE	branched-chain amino acid transport protein BraE	2.80336	0.0044489
PA3234		probable sodium:solute symporter	3.33918	0.0086238
PA4911		probable permease of ABC branched-chain amino acid transporter	5.11995	0.0027833
PA4912		branched chain amino acid ABC transporter membrane protein	6.57892	0.00214536
Non-coding RNA gene
PA3621.1	rsmZ	regulatory RNA RsmZ	4.75354	0.00924675
Protein secretion/export apparatus
PA1875		probable outer membrane protein precursor			11.4761	0.00853261
Putative enzymes
PA1893		hypothetical protein	-2.93791	0.00476749
PA2682		conserved hypothetical protein	-2.98768	0.00758233
PA4073		probable aldehyde dehydrogenase			-3.3053	0.00833051
PA5546		conserved hypothetical protein			4.6015	0.0070933
Related to phage, transposon, or plasmid
PA0616		hypothetical protein	6.87662	0.0072495
PA0617		probable bacteriophage protein	7.8456	0.00865984
PA0618		probable bacteriophage protein	7.19564	0.00773947
PA0619		probable bacteriophage protein	5.91786	0.00987334
PA0620		probable bacteriophage protein	7.52341	0.00575939
PA0621		conserved hypothetical protein	7.65376	0.00653135
PA0622		probable bacteriophage protein	5.96811	0.0044489
PA0623		probable bacteriophage protein	6.27271	0.00701088
PA0637		conserved hypothetical protein	7.02415	0.00811131
PA0638		probable bacteriophage protein	6.26807	0.00902344
PA0641		probable bacteriophage protein	5.55253	0.00959237
PA0643		hypothetical protein	5.96549	0.0085861
PA0644		hypothetical protein			5.03131	0.00973135
Secreted Factors (toxins, enzymes, alginate)
PA4175	piv	protease IV			3.80506	0.0094995
PA5380	gbdR	GbdR	2.57422	0.00575389
PA5059		probable transcriptional regulator			3.96402	0.00632513
Translation, post-translational modification, degradation
PA2851	efp	translation elongation factor P			-4.31259	0.00695811
Transport of small molecules
PA1070	braG	branched-chain amino acid transport protein BraG	2.49182	0.0040167
PA4910		branched chain amino acid ABC transporter ATP binding protein	5.6569	0.00416167
PA4913		probable binding protein component of ABC transporter	4.67298	0.00570765
PA2329		probable ATP-binding component of ABC transporter			14.7132	0.00753209
PA4497		probable binding protein component of ABC transporter			2.31342	0.00978208
