# Supplementary material for: The Regulatory Repertoire of Pseudomonas aeruginosa AmpC ß-Lactamase Regulator AmpR Includes Virulence Genes
Source: PLoS One. 2012 Mar 29;7(3):e34067. doi: 10.1371/journal.pone.0034067 (PMC3315558; doi:10.1371/journal.pone.0034067)
Supplement: Table S7 — Genes in RGPs that are AmpR-regulated. AmpR regulates genes that are part of the different RGPs both in the presence and absence of a ß-lactam antibiotic, listed here with the corresponding fold changes (FC) and p-value. Locus tag annotations are from the Pseudomonas Genome database [31]. (XLSX) [file pone.0034067.s007.xlsx]

## Sheet: Table S7
Table S7: Genes in RGPs that are AmpR-regulated. AmpR regulates genes that are part of the different RGPs both in the presence and absence of a ß-lactam antibiotic, listed here with the corresponding fold changes (FC) and p-value. Locus tag annotations are from the Pseudomonas Genome database (31).
AmpR-Dependent
Locus Tag	Gene Name	Product Name	Function Class	FC	Corrected p-Value
RGP01
PA0208	mdcA	malonate decarboxylase alpha subunit	Carbon compound catabolism	-2.42114	0.00391346
RGP02
PA0263	hcpC	secreted protein Hcp	Secreted Factors (toxins, enzymes, alginate)	-7.66093	0.00466136
RGP03
PA0614		hypothetical protein	Hypothetical, unclassified, unknown	6.66488	0.00826224
PA0615		hypothetical protein	Hypothetical, unclassified, unknown	6.46894	0.0057846
PA0616		hypothetical protein	Related to phage, transposon, or plasmid	6.87662	0.0072495
PA0617		probable bacteriophage protein	Related to phage, transposon, or plasmid	7.8456	0.00865984
PA0618		probable bacteriophage protein	Related to phage, transposon, or plasmid	7.19564	0.00773947
PA0619		probable bacteriophage protein	Related to phage, transposon, or plasmid	5.91786	0.00987334
PA0620		probable bacteriophage protein	Related to phage, transposon, or plasmid	7.52341	0.00575939
PA0621		conserved hypothetical protein	Related to phage, transposon, or plasmid	7.65376	0.00653135
PA0622		probable bacteriophage protein	Related to phage, transposon, or plasmid	5.96811	0.0044489
PA0623		probable bacteriophage protein	Related to phage, transposon, or plasmid	6.27271	0.00701088
RGP04
PA0641		probable bacteriophage protein	Related to phage, transposon, or plasmid	5.55253	0.00959237
PA0643		hypothetical protein	Related to phage, transposon, or plasmid	5.96549	0.0085861
RGP05
PA0729		hypothetical protein	Hypothetical, unclassified, unknown	9.41976	0.00340505
PA0717		hypothetical protein of bacteriophage Pf1	Hypothetical, unclassified, unknown	3.5004	0.00344461
RGP09
PA1092	fliC	flagellin type B	Motility & Attachment	2.4562	0.00962856
RGP20
PA2030		hypothetical protein	Hypothetical, unclassified, unknown	-4.11264	0.00888639
PA2031		hypothetical protein	Hypothetical, unclassified, unknown	-3.21087	0.00870108
PA2034		hypothetical protein	Hypothetical, unclassified, unknown	-4.77721	0.00591126
RGP23
PA2232	pslB	probable phosphomannose isomerase/GDP-mannose pyrophosphorylase	Cell wall / LPS / capsule	-3.17753	0.00870108
PA2234	pslD	PslD	Cell wall / LPS / capsule ; Transport of small molecules	-3.04403	0.00826518
PA2222		hypothetical protein	Hypothetical, unclassified, unknown	-3.10245	0.00494358
PA2235	pslE	hypothetical protein	Hypothetical, unclassified, unknown	-2.97217	0.00317818
RGP31
PA3160	wzz	O-antigen chain length regulator	Cell wall / LPS / capsule	3.72087	0.00880709
RGP34
PA3499		hypothetical protein	Hypothetical, unclassified, unknown	2.4115	0.00697074
PA3505		hypothetical protein	Hypothetical, unclassified, unknown	5.65045	0.00391888
PA3498		probable oxidoreductase	Putative enzymes	-24.5754	0.00072161
PA3506		probable decarboxylase	Putative enzymes	4.78454	0.00575939
RGP44
PA4100		probable dehydrogenase	Central intermediary metabolism	-2.71636	0.00681389
RGP62
PA5150		probable short-chain dehydrogenase	Putative enzymes	-2.04039	0.00546002
AmpR-ß-lactam Dependent
Locus Tag	Gene Name	Product Name	Function Class	FC	Corrected p-Value
RGP04
PA0644		hypothetical protein	Related to phage, transposon, or plasmid	5.03131	0.00973135
RGP09
PA1088		hypothetical protein	Hypothetical, unclassified, unknown	3.13155	0.00973135
PA1090		hypothetical protein	Hypothetical, unclassified, unknown	2.55909	0.00503089
PA1091	fgtA	flagellar glycosyl transferase, FgtA	Hypothetical, unclassified, unknown	3.09291	0.00360133
RGP20
PA2024		probable ring-cleaving dioxygenase	Putative enzymes	6.11837	0.0024628
RGP23
PA2226		hypothetical protein	Hypothetical, unclassified, unknown	2.51678	0.00816215
RGP37
PA3866		pyocin protein	Adaptation, Protection	2.07892	0.0093411
RGP42
PA4673		conserved hypothetical protein	Hypothetical, unclassified, unknown	-2.79661	0.0070933
