# Supplementary material for: The Regulatory Repertoire of Pseudomonas aeruginosa AmpC ß-Lactamase Regulator AmpR Includes Virulence Genes
Source: PLoS One. 2012 Mar 29;7(3):e34067. doi: 10.1371/journal.pone.0034067 (PMC3315558; doi:10.1371/journal.pone.0034067)
Supplement: Table S9 — Phenotypic microarray analysis of PAO1 and PAOΔampR. Phenotypic microarray analysis was performed using Biolog plates, as explained in the text. Phenotypes gained indicate negative regulation by AmpR of these phenotypes, whereas phenotypes lost are those that are positively regulated by AmpR. (XLSX) [file pone.0034067.s009.xlsx]

## Sheet: Table S9
Table S9: Phenotypic microarray analysis of PAO1 and PAO∆ampR. Phenotypic microarray analysis was performed using Biolog plates, as explained in the text. Phenotypes gained indicate negative regulation by AmpR of these phenotypes, whereas phenotypes lost are those that are positively regulated by AmpR.
Phenotypes Gained
Plate no.	Substrate	Nature of substrate
PM05	L-Histidine	Nutritional supplement
PM05	L-Leucine	Nutritional supplement
PM05	L-Serine	Nutritional supplement
PM05	L-Citrulline	Nutritional supplement
PM05	(-)Shikimic acid	Nutritional supplement
PM05	Spermidine	Nutritional supplement
PM05	Pyridoxal	Nutritional supplement
Phenotypes Lost
Plate no.	Substrate	Nature of substrate
PM02A	L-Pyroglutamic acid	C-Source, amino acid
PM03B	Uric acid	N-Source, other
PM11C	Amoxicillin	wall, lactam
PM11C	Potassium tellurite	toxic anion
PM11C	Cephalothin	wall, cephalosporin
PM12B	Penicillin G	wall, lactam
PM12B	Oxacillin	wall, lactam
PM12B	Paromomycin	protein synthesis, 30S ribosomal subunit, aminoglycoside
PM12B	Vancomycin	wall
PM12B	Sisomicin	protein synthesis, 30S ribosomal subunit, aminoglycoside
PM12B	Novobiocin	DNA topoisomerase
PM12B	2,4-Diamino-6,7-diisopropylpteridine	folate antagonist, vibriostatic agent
PM12B	Tobramycin	protein synthesis, 30S ribosomal subunit, aminoglycoside
PM12B	Spectinomycin	protein synthesis, 30S ribosomal subunit, aminoglycoside
PM12B	Spiramycin	protein synthesis, 50S ribosomal subunit, macrolide
PM12B	Rifampicin	RNA polymerase
PM14A	Sodium metavanadate	toxic anion, PO4 analog
PM14A	Sodium orthovanadate	toxic anion, PO4 analog
PM15B	Guanidine hydrochloride	membrane, chaotropic agent
PM15B	Cefmetazole	wall, cephalosporin
PM15B	D- Cycloserine	wall
PM15B	Alexidine	membrane, electron transport, biguanide
PM15B	3,4- Dimethoxybenzyl alcohol	oxidizing agent, free radical-peroxidase substrate
PM15B	2- Nitroimidazole	nitro compound, oxidizing agent, ribonucleotide DP reductase inhibitor
PM16A	Cefotaxime	wall, cephalosporin
PM16A	Streptomycin	protein synthesis, 30S ribosomal subunit, aminoglycoside
PM16A	Chromium (III) chloride	toxic cation
PM17A	4-Aminopyridine	ion channel inhibitor, K+
PM17A	Lithium chloride	toxic cation
PM18C	Azathioprine	nucleic acid analog, purine
PM18C	Poly-L-lysine	membrane, detergent, cationic
PM18C	Pentachlorophenol	respiration, ionophore, H+
PM18C	Sodium Bromate	toxic anion
PM18C	Sodium periodate	toxic anion, oxidizing agent
PM18C	Semicarbazide hydrochloride	amine oxidase inhibitor, carcinogen
PM18C	5-Fluoro-5`-deoxyuridine	nucleic acid analog, pyrimidine, DNA synthesis
PM19	Coumarin	DNA intercalator
PM19	Harmane	imidazoline binding sites, agonist
PM19	7-Hydroxycoumarin	DNA intercalator
PM19	Phenethicilllin	wall, lactam
PM19	Lauryl sulfobetaine (N-Dodecyl-N,N-dimethyl-3- ammonio-1-propanesulfonate)	membrane, detergent, zwitterionic
PM20B	Amitriptyline	membrane, transport
PM20B	Orphenadrine	anti-cholinergic
PM20B	Ciprofloxacin	DNA topoisomerase
PM20B	Oxytetracycline	protein synthesis, 30S ribosomal subunit, tetracycline
PM20B	Captan	fungicide, carbamate
PM20B	Tolylfluanid	fungicide, phenylsulphamide
