# Supplementary material for: The Regulatory Repertoire of Pseudomonas aeruginosa AmpC ß-Lactamase Regulator AmpR Includes Virulence Genes
Source: PLoS One. 2012 Mar 29;7(3):e34067. doi: 10.1371/journal.pone.0034067 (PMC3315558; doi:10.1371/journal.pone.0034067)
Supplement: Table S10 — Primers used in this work. All primers were designed as part of this study. qRT in the primer name indicates that the primer was designed for qPCR. (XLSX) [file pone.0034067.s010.xlsx]

## Sheet: Table S10
Table S10: Primers used in this work. All primers were designed as part of this study. qRT in the primer name indicates that the primer was designed for qPCR.
Primer Name	Sequence
KMampRUF1	5'- GGAATTCAGCCTGGAACTTCCGCAATCTCGACGAGA -3'
KMampRUR1	5- GAGCATTCTAGCTAGCTAGGTTCGCCACCGAAGTGAGTACC -3'
KMampRDF2	5'- CTAGCTAGCTAGAATGCTCAATGGGGTCGAACCAATCTCTGCTCC -3'
KMampRDR2	5'- CGGGATCCGATGCTCGGGTTGGAATAGA -3'
DBS_ampRF2	5'- GGGGTACCGAAGGAGATATACCTTGGTTCGACCCCATTTGCCGCTGAAC -3'
DBS_ampRR2	5'- CGAGCTCTCTCCCCCGCGCCTCAAC -3'
DBS_qRT_clpXF	5'- TGCGATTACGATGTGGAGA -3'
DBS_qRT_clpXR	5'- CCCTCGATGAGCTTCAGCA -3'
DBS_qRT_ampCF	5'- CGCCGTACAACCGGTGAT -3'
DBS_qRT_ampCR	5'- CGGCCGTCCTCTTTCGA -3'
DBS_qRT_ampGF	5'- GGCCTGACCTATGCGTTGTT -3'
DBS_qRT_ampGR	5'- CGACGGGTTGACGTGGAT -3'
DBS_qRT_ampPF	5'- ACCGCCGCCTGGTCAT -3'
DBS_qRT_ampPR	5'- CAGGCCGATGGGAATGC -3'
DBS_qRT_ampDF	5'- TCAGGAGCCCGATGCATTTCGATT -3'
DBS_qRT_ampDR	5'- ACGCAGGTTGAAATTCGGTGAAGG -3'
DBS_qRT_ampDh2F2	5'- CGCAGCGTGTTGCACATC -3'
DBS_qRT_ampDh2R2	5'- GGGTGAAGGCCAGTAGAACGAA -3'
DBS_qRT_ampDh3F2	5'- CGACGGCGTGTTCACCTT -3'
DBS_qRT_ampDh3R2	5'- CAGGATGTTCTTCGCCAGTTG -3'
DBS_qRT_nagZF	5'- ATGCAAGGCTCTCTGATGCTCGAC -3'
DBS_qRT_nagZR	5'- ATCATCTTCGCTCGCAACATCGAG -3'
DBS_qRT_mexTF	5'- ACCTCATGGGTTGTGACTGTATCC -3'
DBS_qRT_mexTR	5'- TAGGATCACTGACAGGCATAGCCA -3'
DBS_qRT_mexRF	5'- GTTCGTTGCATAGCGTTGTCCTCA -3'
DBS_qRT_mexRR	5'- TTGATAACCGGCCATCGAGCTAAA -3'
DBS_qRT_oprDF2	5'- TTTCCGCAGGTAGCACTCAGT -3'
DBS_qRT_oprDR2	5'- CTTCGCTTCGGCCTGATC -3'
DBS_qRT_lasAF	5'- TTCTGTGATCGATTCGGCTCGGTT -3'
DBS_qRT_lasAR	5'- ACCCGGGAAGACAACTATCAGCTT -3'
DBS_qRT_lecAF	5'- CACCATTGTGTTTCCTGGCGTTCA -3'
DBS_qRT_lecAR	5'- AGAAGGCAACGTCGACTCGTTGAT -3'
DBS_qRT_lecBF	5'- AGACAGCGTAACAATCGAACGAGC -3'
DBS_qRT_lecBR	5'- AGGACGCATCGTTCAGCCAATCTA -3'
DBS_qRT_rpoSF	5'- CGGCGAGTTGGTCATCATCAAACA -3'
DBS_qRT_rpoSR	5'- ATCGATTGCCCTACCTTGACCTGT -3'
DBS_qRT_fleRSF	5'- TAGAGAAGATGCGCAAGTACGGCA -3'
DBS_qRT_fleRSR	5'- TGTCGGTCGACGGAGATATAGCAA -3'
DBS_qRT_pcrHF	5'- CGCTCAACCGCTTCATCCAGAAAT -3'
DBS_qRT_pcrHR	5'- TAGAGGTATCCATGAACCAGCCGA -3'
DBS_qRT_exsEF	5'- CCGTTTCGATCTGCATTTCGGCTT -3'
DBS_qRT_exsER	5'- CAACTGACCCTCGAATGCTTCGA -3'
DBS_qRT_rsmZF2	5'- GACGGTACTGGGTGTCAAAGG -3'
DBS_qRT_rsmZR2	5'- TGGTAAATTTCCTCCCGGTGTA -3'
DBS_qRT_prtRF	5'- TCCCTGCACCCATGTGAAATCTCT -3'
DBS_qRT_prtRR	5'- ATCGGCAATCTACAGACCGATGGA -3'
DBS_qRT_creBF	5'- GCATATCCTGATCGTCGAAGATG -3'
DBS_qRT_creBR	5'- GGCCTGCAGGGCGTAGA -3'
DBS_qRT_creDF	5'- CGCCATCGCCCTACTCAT -3'
DBS_qRT_creDR	5'- GGCGATCGCGGATCAG -3'
DBS_qRT_prtNF	5'- CTGGTTTCGCAACCTGAACAAGGA -3'
DBS_qRT_prtNR	5'- TAGTCACAAGGCCATGCAGTTCGT -3'
DBS_qRT_algTF	5'- AACCCAGGAACAGGATCAGCAACT -3'
DBS_qRT_algTR	5'- AGATACTGGGATTGATCGTGCGGT -3'
DBS_qRT_PA3602F	5'- ACGAATTCATCAGCCACTCGATGC -3'
DBS_qRT_PA3602R	5'- TGTTCAACGTCTCGGCGATGAGTT -3'
DBS_qRT_mexEF	5'- TCATCGAACAACCGCTGAACGAGT -3'
DBS_qRT_mexER	5'- ATGAAGGCGCACTGGTGAAGAAAG -3'
DBS_qRT_PA4121F	5'- ATCAAGACACCGAATACCCGCAAC -3'
DBS_qRT_PA4121R	5'- TACGTGATCGTCAACGAGTTCAGC -3'
DBS_qRT_popBF	5'- AACTCAAGCTGACCGAAATCGAGC -3'
DBS_qRT_popBR	5'- ACAACCAGCAGAAGATCAGGGAGT -3'
DBS_qRT_hcnAF	5'- TTGAACGTCAACACGATATCCAGCCC -3'
DBS_qRT_hcnAR	5'- AGACCGTGCTCAACGTGCTCAAT -3'
DBS_qRT_flgCF	5'- GTCGAGGAAATGGCCGACATGATT -3'
DBS_qRT_flgCR	5'- ACCGCCAAACAGATGATGCAGAAG -3'
DBS_qRT_PA2069F	5'- AAACCAGGTGCTGGGCATGTTCAA -3'
DBS_qRT_PA2069R	5'- AACGCACCGAGTTCATGCCATT -3'
DBS_qRT_PA2331F	5'- TTATATCCCGAATCTGCTCGGCGT -3'
DBS_qRT_PA2331R	5'- ATGGCTGCGACTTCTGCGTT -3'
